**Table S1. SNPs associated with log SHBG levels at  $P < 10^{-5}$  from a meta-analysis of the NHS GWAS and SIBS stud**

| <u>SNP</u> | <u>Chr</u> | <u>Position<sup>a</sup></u> | <u>Gene Region (+-20kb)</u>                       | <u>WT<sup>b</sup></u> |
|------------|------------|-----------------------------|---------------------------------------------------|-----------------------|
| rs727428   | 17         | 7478517                     | FXR2/SHBG/SAT2/ATP1B2                             | C                     |
| rs1641523  | 17         | 7490406                     | SHBG/SAT2/ATP1B2                                  | T                     |
| rs9902027  | 17         | 7381708                     | TNFSF12                                           | T                     |
| rs8073177  | 17         | 7381308                     | TNFSF12                                           | C                     |
| rs12150660 | 17         | 7462640                     | FXR2/SHBG/SAT2                                    | G                     |
| rs4227     | 17         | 7431901                     | SEN3/EIF4A1/CD68/MPDU1/SOX15/FXR2                 | T                     |
| rs3933469  | 17         | 7440227                     | EIF4A1/CD68/MPDU1/SOX15/FXR2/SHBG                 | G                     |
| rs2955617  | 17         | 7479510                     | SHBG/SAT2/ATP1B2                                  | A                     |
| rs4602096  | 17         | 7414181                     | TNFSF12/TNFSF13/SEN3/EIF4A1/CD68/MPDU1/SOX15      | A                     |
| rs1641537  | 17         | 7486446                     | SHBG/SAT2/ATP1B2                                  | C                     |
| rs1641536  | 17         | 7486709                     | SHBG/SAT2/ATP1B2                                  | C                     |
| rs1641525  | 17         | 7489936                     | SHBG/SAT2/ATP1B2                                  | T                     |
| rs1619016  | 17         | 7491278                     | SHBG/SAT2/ATP1B2                                  | T                     |
| rs12940684 | 17         | 7394643                     | TNFSF12/TNFSF13/SEN3                              | T                     |
| rs9899183  | 17         | 7393701                     | TNFSF12/TNFSF13/SEN3                              | T                     |
| rs4968214  | 17         | 7418201                     | TNFSF12/TNFSF13/SEN3/EIF4A1/CD68/MPDU1/SOX15/FXR2 | G                     |
| rs4968212  | 17         | 7408940                     | TNFSF12/TNFSF13/SEN3/EIF4A1/CD68/MPDU1            | C                     |
| rs11655920 | 17         | 7362420                     | POLR2A                                            | C                     |
| rs9896688  | 17         | 7424639                     | TNFSF12/TNFSF13/SEN3/EIF4A1/CD68/MPDU1/SOX15/FXR2 | A                     |
| rs1042522  | 17         | 7520197                     | ATP1B2/TP53/WRAP53                                | C                     |
| rs6761     | 17         | 7358387                     | POLR2A                                            | T                     |
| rs2071502  | 17         | 7355682                     | POLR2A                                            | C                     |
| rs4151120  | 17         | 7282872                     | NLGN2/SPEM1/C17orf74/TMEM102/FGF11/CHRNA1         | T                     |
| rs10514317 | 5          | 89145506                    |                                                   | C                     |
| rs9901643  | 17         | 7360548                     | POLR2A                                            | G                     |
| rs3853818  | 17         | 7287026                     | C17orf74/TMEM102/FGF11/CHRNA1/ZBTB4               | C                     |
| rs9632415  | 5          | 89070647                    |                                                   | G                     |
| rs2241233  | 17         | 7259120                     | C17orf61-PLSCR3/NLGN2/SPEM1/C17orf74              | T                     |
| rs6721345  | 2          | 241732719                   | SNED1/MTERFD2                                     | G                     |
| rs11078685 | 17         | 7352171                     | POLR2A                                            | T                     |
| rs424950   | 1          | 160688161                   |                                                   | G                     |
| rs8077059  | 17         | 53178551                    |                                                   | T                     |
| rs3849491  | 3          | 76566873                    |                                                   | C                     |
| rs12941732 | 17         | 53181345                    |                                                   | C                     |
| rs13162065 | 5          | 89138911                    |                                                   | T                     |
| rs9303396  | 17         | 53180117                    |                                                   | C                     |
| rs8067868  | 17         | 53179948                    |                                                   | G                     |
| rs10795130 | 10         | 4141121                     |                                                   | T                     |
| rs6878955  | 5          | 89125073                    |                                                   | C                     |
| rs260918   | 1          | 160690928                   |                                                   | G                     |
| rs10904188 | 10         | 4140191                     |                                                   | G                     |
| rs2071504  | 17         | 7346661                     | ZBTB4/SLC35G6/POLR2A                              | C                     |
| rs7079146  | 10         | 4136692                     |                                                   | C                     |
| rs11252345 | 10         | 4135947                     |                                                   | G                     |
| rs13313101 | 10         | 4135640                     |                                                   | A                     |
| rs9905773  | 17         | 53163063                    |                                                   | A                     |
| rs9916043  | 17         | 53168259                    |                                                   | T                     |
| rs13290    | 17         | 7270356                     | NLGN2/SPEM1/C17orf74/TMEM102/FGF11/CHRNA1         | G                     |
| rs12596210 | 16         | 52585472                    | FTO                                               | T                     |
| rs8076475  | 17         | 53169748                    |                                                   | T                     |
| rs2058104  | 17         | 53171721                    |                                                   | G                     |
| rs8075326  | 17         | 53168868                    |                                                   | T                     |

<sup>a</sup>From NCI genome build 35. <sup>b</sup>Wildtype' or common allele. <sup>c</sup>'Variant' or minor allele. <sup>d</sup>Minor allele frequency. <sup>e</sup>From anal

past PMH use, laboratory batch, and four eigenvectors of the principal components identified by Eigenstrat. Shown are f  
within NHS. <sup>f</sup>From analyses adjusting for age at blood draw, BMI at blood draw, WHR, past PMH use, and laboratory b  
<sup>g</sup>Combined effect sizes and P values are calculated using a fixed-effects meta-analysis (METAL software).

ly GWAS among non-PMH users

| VT <sup>c</sup> | NHS              |           |                      | SIBS             |           |          | Joint Analysis |                      | Q    | I <sup>2</sup> | P <sub>heterogeneity</sub> <sup>g</sup> |
|-----------------|------------------|-----------|----------------------|------------------|-----------|----------|----------------|----------------------|------|----------------|-----------------------------------------|
|                 | MAF <sup>d</sup> | $\beta^e$ | P-value <sup>e</sup> | MAF <sup>d</sup> | $\beta^f$ | P-value  | $\beta^g$      | P-value <sup>g</sup> |      |                |                                         |
| T               | 0.40             | -0.1368   | 4.08E-08             | 0.44             | -0.1199   | 8.27E-10 | -0.1263        | 2.09E-16             | 0.28 | 0%             | 0.59                                    |
| C               | 0.38             | -0.1321   | 3.21E-07             | 0.41             | -0.1233   | 2.51E-09 | -0.1267        | 4.40E-15             | 0.07 | 0%             | 0.79                                    |
| C               | 0.23             | -0.1527   | 1.96E-08             | 0.22             | -0.1082   | 6.73E-06 | -0.1277        | 1.30E-12             | 1.50 | 33%            | 0.22                                    |
| T               | 0.23             | -0.1513   | 4.38E-08             | 0.22             | -0.1096   | 5.98E-06 | -0.1277        | 2.35E-12             | 1.29 | 22%            | 0.26                                    |
| T               | 0.26             | 0.1196    | 3.05E-05             | 0.26             | 0.1320    | 7.89E-08 | 0.1268         | 1.20E-11             | 0.11 | 0%             | 0.74                                    |
| G               | 0.28             | 0.1236    | 6.43E-06             | 0.29             | 0.1105    | 1.00E-06 | 0.1157         | 3.26E-11             | 0.14 | 0%             | 0.71                                    |
| A               | 0.28             | 0.1208    | 1.53E-05             | 0.27             | 0.1160    | 1.81E-06 | 0.1181         | 1.29E-10             | 0.02 | 0%             | 0.90                                    |
| C               | 0.33             | -0.1139   | 2.23E-06             | 0.35             | -0.0884   | 2.26E-05 | -0.0993        | 3.13E-10             | 0.64 | 0%             | 0.42                                    |
| C               | 0.17             | -0.1548   | 2.33E-07             | 0.17             | -0.1016   | 1.67E-04 | -0.1254        | 4.02E-10             | 1.74 | 43%            | 0.19                                    |
| T               | 0.12             | -0.1445   | 1.75E-05             | 0.13             | -0.1375   | 7.09E-06 | -0.1407        | 5.63E-10             | 0.02 | 0%             | 0.88                                    |
| T               | 0.12             | -0.1436   | 2.02E-05             | 0.12             | -0.1374   | 7.25E-06 | -0.1402        | 6.59E-10             | 0.02 | 0%             | 0.89                                    |
| C               | 0.12             | -0.1409   | 2.94E-05             | 0.12             | -0.1373   | 7.44E-06 | -0.1389        | 9.72E-10             | 0.01 | 0%             | 0.94                                    |
| C               | 0.12             | -0.1346   | 6.45E-05             | 0.12             | -0.1362   | 8.43E-06 | -0.1355        | 2.35E-09             | 0.00 | 0%             | 0.97                                    |
| C               | 0.30             | 0.0931    | 5.80E-04             | 0.30             | 0.1079    | 2.09E-06 | 0.1019         | 5.41E-09             | 0.17 | 0%             | 0.68                                    |
| C               | 0.27             | 0.0856    | 1.90E-03             | 0.27             | 0.1196    | 6.85E-07 | 0.1050         | 7.83E-09             | 0.85 | 0%             | 0.36                                    |
| A               | 0.30             | 0.0951    | 3.80E-04             | 0.31             | 0.0981    | 8.89E-06 | 0.0969         | 1.37E-08             | 0.01 | 0%             | 0.93                                    |
| T               | 0.30             | 0.0969    | 3.00E-04             | 0.30             | 0.0943    | 1.57E-05 | 0.0953         | 1.93E-08             | 0.01 | 0%             | 0.94                                    |
| T               | 0.36             | -0.0521   | 4.32E-02             | 0.40             | -0.1104   | 1.25E-07 | -0.0875        | 7.57E-08             | 3.06 | 67%            | 0.08                                    |
| T               | 0.14             | -0.1404   | 1.52E-05             | 0.13             | -0.0935   | 1.78E-03 | -0.1150        | 1.82E-07             | 1.12 | 11%            | 0.29                                    |
| G               | 0.21             | -0.1386   | 7.08E-06             | 0.20             | -0.0798   | 3.99E-03 | -0.1060        | 2.88E-07             | 2.00 | 50%            | 0.16                                    |
| C               | 0.36             | -0.0511   | 3.91E-02             | 0.40             | -0.0970   | 1.10E-06 | -0.0792        | 3.66E-07             | 2.07 | 52%            | 0.15                                    |
| G               | 0.36             | -0.0509   | 4.02E-02             | 0.40             | -0.0972   | 1.22E-06 | -0.0791        | 4.19E-07             | 2.09 | 52%            | 0.15                                    |
| A               | 0.37             | 0.0644    | 1.14E-02             | 0.37             | 0.1458    | 1.68E-06 | 0.0982         | 5.55E-07             | 4.18 | 76%            | 0.04                                    |
| T               | 0.13             | -0.0981   | 4.88E-03             | 0.11             | -0.1791   | 1.26E-05 | -0.1323        | 6.96E-07             | 2.26 | 56%            | 0.13                                    |
| A               | 0.13             | -0.0951   | 3.53E-03             | 0.15             | -0.1201   | 6.65E-05 | -0.1087        | 9.69E-07             | 0.31 | 0%             | 0.58                                    |
| T               | 0.42             | -0.0730   | 2.39E-03             | 0.37             | -0.1037   | 9.14E-05 | -0.0870        | 1.14E-06             | 0.73 | 0%             | 0.39                                    |
| A               | 0.06             | -0.2018   | 6.03E-03             | 0.05             | -0.3207   | 3.12E-05 | -0.2589        | 1.23E-06             | 1.24 | 19%            | 0.27                                    |
| C               | 0.15             | -0.0831   | 8.87E-03             | 0.16             | -0.2206   | 2.86E-06 | -0.1265        | 1.77E-06             | 5.83 | 83%            | 0.02                                    |
| A               | 0.01             | 0.7564    | 1.00E-01             | 0.01             | 1.2666    | 6.54E-06 | 1.1299         | 2.60E-06             | 0.88 | 0%             | 0.35                                    |
| C               | 0.37             | -0.0378   | 1.27E-01             | 0.42             | -0.0930   | 3.05E-06 | -0.0716        | 4.37E-06             | 2.97 | 66%            | 0.08                                    |
| C               | 0.48             | 0.0901    | 1.90E-04             | 0.48             | 0.0640    | 5.30E-03 | 0.0763         | 4.76E-06             | 0.61 | 0%             | 0.43                                    |
| C               | 0.24             | -0.0974   | 4.10E-04             | 0.25             | -0.0699   | 2.81E-03 | -0.0813        | 5.40E-06             | 0.58 | 0%             | 0.45                                    |
| T               | 0.49             | -0.0716   | 4.25E-03             | 0.47             | -0.0745   | 3.87E-04 | -0.0733        | 5.52E-06             | 0.01 | 0%             | 0.93                                    |
| G               | 0.23             | -0.1041   | 2.00E-04             | 0.25             | -0.0669   | 4.86E-03 | -0.0824        | 5.64E-06             | 1.02 | 2%             | 0.31                                    |
| C               | 0.26             | -0.0537   | 5.12E-02             | 0.25             | -0.1019   | 1.68E-05 | -0.0816        | 5.92E-06             | 1.75 | 43%            | 0.19                                    |
| T               | 0.23             | -0.1009   | 3.00E-04             | 0.25             | -0.0677   | 4.14E-03 | -0.0814        | 6.57E-06             | 0.82 | 0%             | 0.36                                    |
| A               | 0.23             | -0.1006   | 3.20E-04             | 0.25             | -0.0677   | 4.06E-03 | -0.0813        | 6.75E-06             | 0.80 | 0%             | 0.37                                    |
| G               | 0.13             | 0.0825    | 2.48E-02             | 0.13             | 0.1158    | 7.25E-05 | 0.1031         | 6.97E-06             | 0.50 | 0%             | 0.48                                    |
| G               | 0.26             | -0.0532   | 5.34E-02             | 0.25             | -0.1004   | 2.03E-05 | -0.0807        | 7.14E-06             | 1.68 | 40%            | 0.20                                    |
| A               | 0.48             | 0.0884    | 2.00E-04             | 0.48             | 0.0601    | 7.53E-03 | 0.0734         | 7.37E-06             | 0.74 | 0%             | 0.39                                    |
| A               | 0.13             | 0.0839    | 2.16E-02             | 0.14             | 0.1075    | 9.96E-05 | 0.0990         | 7.44E-06             | 0.26 | 0%             | 0.61                                    |
| T               | 0.14             | -0.0850   | 9.07E-03             | 0.15             | -0.1065   | 2.34E-04 | -0.0971        | 7.73E-06             | 0.24 | 0%             | 0.62                                    |
| T               | 0.13             | 0.0834    | 2.24E-02             | 0.14             | 0.1069    | 1.02E-04 | 0.0985         | 7.89E-06             | 0.26 | 0%             | 0.61                                    |
| A               | 0.13             | 0.0833    | 2.25E-02             | 0.14             | 0.1071    | 1.02E-04 | 0.0986         | 7.89E-06             | 0.27 | 0%             | 0.60                                    |
| G               | 0.13             | 0.0831    | 2.27E-02             | 0.14             | 0.1072    | 1.01E-04 | 0.0985         | 7.97E-06             | 0.27 | 0%             | 0.60                                    |
| T               | 0.25             | -0.0897   | 1.27E-03             | 0.25             | -0.0731   | 1.75E-03 | -0.0799        | 8.40E-06             | 0.21 | 0%             | 0.65                                    |
| C               | 0.23             | -0.0980   | 4.50E-04             | 0.24             | -0.0657   | 3.66E-03 | -0.0784        | 8.53E-06             | 0.80 | 0%             | 0.37                                    |
| T               | 0.36             | -0.0650   | 1.06E-02             | 0.30             | -0.1208   | 9.33E-05 | -0.0877        | 8.71E-06             | 1.93 | 48%            | 0.16                                    |
| C               | 0.10             | -0.1418   | 5.30E-04             | 0.13             | -0.1034   | 3.77E-03 | -0.1199        | 8.74E-06             | 0.50 | 0%             | 0.48                                    |
| C               | 0.23             | -0.0981   | 4.40E-04             | 0.24             | -0.0651   | 3.83E-03 | -0.0781        | 8.84E-06             | 0.84 | 0%             | 0.36                                    |
| A               | 0.23             | -0.0971   | 5.10E-04             | 0.25             | -0.0662   | 3.62E-03 | -0.0784        | 9.11E-06             | 0.73 | 0%             | 0.39                                    |
| G               | 0.23             | -0.0981   | 4.40E-04             | 0.24             | -0.0643   | 4.02E-03 | -0.0774        | 9.49E-06             | 0.89 | 0%             | 0.35                                    |

lyses adjusting for age at blood draw, BMI at blood draw, case-control status,

3 estimates for the minor allele variant and P-values among the non-PMH users  
atch.
